1 **Genome-wide homology analysis reveals new insights into the origin of the wheat B genome**

2  
3 Wei Zhang<sup>a,1</sup>, Mingyi Zhang<sup>a,1</sup>, Xianwen Zhu<sup>a</sup>, Yaping Cao<sup>a</sup>, Qing Sun<sup>b</sup>, Guojia Ma<sup>a</sup>, Shiaoman  
4 Chao<sup>c</sup>, Changhui Yan<sup>b</sup>, Steven S. Xu<sup>c</sup>, and Xiwen Cai<sup>a,2</sup>

5  
6 <sup>a</sup>Department of Plant Sciences, <sup>b</sup>Department of Computer Science, North Dakota State  
7 University, Fargo, ND 58108-6050, USA; and <sup>c</sup>USDA-ARS, the Red River Valley Agricultural  
8 Research Center, Fargo, ND 58102, USA

9  
10  
11  
12  
13  
14  
15  
16  
17  
18  
19  
20  
21  
22  
23  
24  
25  
26  
27 <sup>1</sup> Authors with equal contribution to this work.

28 <sup>2</sup> To whom correspondence should be addressed. Tel: 701-231-7404; E-mail:  
29 [xiwen.cai@ndsu.edu](mailto:xiwen.cai@ndsu.edu)

31 **Abstract**

32

33 Wheat is a typical allopolyploid with three homoeologous subgenomes (A, B, and D). The  
34 ancestors of the subgenomes A and D had been identified, but not for the subgenome B. The  
35 goatgrass *Aegilops speltoides* (genome SS) has been controversially considered a candidate for  
36 the ancestor of the wheat B genome. However, the relationship of the *Ae. speltoides* S genome  
37 with the wheat B genome remains largely obscure, which has puzzled the wheat research  
38 community for nearly a century. In the present study, the genome-wide homology analysis  
39 identified perceptible homology between wheat chromosome 1B and *Ae. speltoides* chromosome  
40 1S, but not between other chromosomes in the B and S genomes. An *Ae. speltoides*-originated  
41 segment spanning a genomic region of approximately 10.46 Mb was identified on the long arm  
42 of wheat chromosome 1B (1BL). The *Ae. speltoides*-originated segment on 1BL was found to  
43 co-evolve with the rest of the B genome in wheat species. Thereby, we conclude that *Ae.*  
44 *speltoides* had been involved in the origin of the wheat B genome, but should not be considered  
45 an exclusive ancestor of this genome. The wheat B genome might have a polyphyletic origin  
46 with multiple ancestors involved, including *Ae. speltoides*. These novel findings provide  
47 significant insights into the origin and evolution of the wheat B genome, and will facilitate  
48 polyploid genome studies in wheat and other plants as well.

49

50

51

52

53

54 **Keywords:** *Aegilops speltoides*; genome homology; genomic *in situ* hybridization (GISH);  
55 meiotic pairing; single nucleotide polymorphisms (SNPs); wheat B genome

56

57

58

59

60

61

## 62 **Introduction**

63

64 Wheat (*Triticum aestivum*,  $2n=6x=42$ , genome AABBDD), a major food grain source for  
65 humans, has been considered a typical allohexaploid originated from the interspecific  
66 hybridization involving three diploid ancestors (Sakamura 1918; Kihara 1919, 1954; Kihara et al.  
67 1959; Sax 1922). This evolutionary theory of allopolyploid has led to successful identification of  
68 the ancestors for the wheat subgenomes A and D, but not yet for the subgenome B. The wild  
69 grasses *T. urartu* ( $2n=2x=14$ , genome AA) and *Aegilops tauschii* ( $2n=2x=14$ , genome DD)  
70 contributed A and D subgenomes to wheat, respectively (Kihara 1944; McFadden and Sears  
71 1946; Dvorak et al. 1993). The ancestor of the subgenome B, however, remains controversial  
72 even though tremendous research efforts have been made to tackle this evolutionary puzzle of  
73 wheat for nearly a century.

74

75 Early studies on meiotic pairing, karyotyping, plant morphology, and geographic distribution of  
76 wheat-related wild species and their hybrids with wheat species (*Triticum* L.) identified the  
77 goatgrass *Ae. speltoides* ( $2n=2x=14$ , genome SS) as the closest ancestor of the wheat B genome  
78 (Jenkins 1929; Pathak 1940; Sarkar and Stebbins 1956; Riley et al. 1958). Meanwhile, questions  
79 had been raised about the meiotic pairing-based assessment of genome homology in these early  
80 studies because *Ae. speltoides* was suspected to contain genetic factors with epistatic effect on  
81 the wheat diploidization system, now designated *Ph* (pairing homoeologous) gene (Jenkins 1929;  
82 Sarkar and Stebbins 1956; Riley et al. 1958). The *Ph* gene limits meiotic pairing to homologous  
83 chromosomes in wheat and wheat hybrids with its relatives. Also, it had been assumed that the  
84 ancestral form of the B genome might have undergone a series of changes since its incorporation  
85 into wheat (Jenkins 1929; Sarkar and Stebbins 1956).

86

87 In a later study, Riley et al. (1961) confirmed the presence of the gene(s) in *Ae. speltoides* that  
88 suppresses the effect of the *Ph1* gene located on wheat chromosome 5B. Three genotypes with  
89 high, intermediate, and low ability to suppress *Ph1* activity were identified in *Ae. speltoides*  
90 (Dvorak 1972). According to these findings, Kimber and Athwal (1972) reassessed meiotic  
91 pairing in the hybrids and amphiploids involving wheat and *Ae. speltoides* accessions with  
92 different levels of suppression for the *Ph1* activity. They determined that the variation of meiotic

93 pairing in the hybrids resulted from the presence of different *Phl* suppressors in the *Ae.*  
94 *speltoides* accessions. Also, they found that chromosomes predominantly paired as bivalents in  
95 the amphiploid involving polyploid wheat and a low pairing *Ae. speltoides* accession, which was  
96 very similar to a normal diploidized allopolyploid. As a result, they concluded that *Ae. speltoides*  
97 could not be considered as the ancestor of the wheat B genome. This was also supported by the  
98 evidence of chromosome banding patterns (Gill and Kimber 1974) and protein electrophoretic  
99 profiles (Johnson 1972). More recently, three *Phl* suppressor gene loci were identified and  
100 mapped to chromosome 3S, 5S, and 7S of *Ae. speltoides*, respectively (Dvorak et al. 2006).

101  
102 In contrast, molecular analyses of both nuclear and extranuclear genomic DNAs suggested that  
103 *Ae. speltoides* or a species in the evolutionary lineage of *Ae. speltoides* could be the most likely  
104 ancestor of the wheat B genome as well as wheat plasmon (Ogihar and Tsunewaki 1988; Dvorak  
105 and Zhang 1990; Sasanuma et al. 1996; Wang et al. 1997; Kilian et al. 2007). However,  
106 comparative analysis of several gene loci and nearby genomic regions across the *Triticum* and  
107 *Aegilops* species did not reveal clear evidence supporting that conclusion (Hang et al. 2002;  
108 Salse et al. 2008). The *Ae. speltoides* S genome was considered to be evolutionarily closer to the  
109 wheat B genome than to the A and D genomes, but its candidacy as the ancestor of B genome  
110 remained undetermined in both studies.

111  
112 The wheat B genome has significantly higher genetic variability than A and D genomes (Chao et  
113 al. 1989; Felsenburg et al. 1991; Siedler et al. 1994; Petersen et al. 2006). These findings support  
114 the hypothesis that the wheat B genome had diverged from its ancestor through various genomic  
115 modifications (Jenkins 1929; Sarkar and Stebbins 1956; Blake et al. 1999). In addition, *Ae.*  
116 *speltoides* has significantly higher intraspecific genetic variability than any of the other four  
117 *Aegilops* species in the Sitopsis section, which is even comparable to the interspecific variability  
118 among the other four *Aegilops* species in the section (Sasanuma et al. 1996). This appears to  
119 support the hypothesis that *Ae. speltoides* might contribute to the origin of the wheat B genome,  
120 but the current version of *Ae. speltoides* had diverged from the original ancestor of the B genome  
121 (Salse 2008). Another hypothesis, proposed by Zohary and Feldman (Zohary and Feldman  
122 1962), states that the wheat B genome is a reconstructed genome resulted from meiotic  
123 homoeologous recombination between multiple ancestral genomes of the *Aegilops* species. This

124 evolutionary recombination process was assumed to occur in the hybrids of the tetraploid  
125 amphiploids that combined the different ancestral *Aegilops* genomes and a common ancestral A  
126 genome of *T. urartu*. In other words, the wheat B genome might have a polyphyletic origin.

127  
128 A species with a genome more closely related to the wheat B genome than the S genome of *Ae.*  
129 *speltoides* has not been discovered even though intensive search for the ancestor of B genome  
130 has been performed over nearly a century. It seems inevitable to reason that *Ae. speltoides* might  
131 contribute to the origin and evolution of the wheat B genome to some extent according to the  
132 previous studies. The present study aimed to assess the homology of individual wheat B-genome  
133 chromosomes with their homoeologous counterparts in the S genome of *Ae. speltoides* and to  
134 detect the *Ae. speltoides* genomic components in the wheat B genome if there are any. A novel  
135 integrative cytogenetic and genomic approach was taken to accomplish this research, which  
136 could not be done in the previous studies due to the lack of the genomics/cytogenetics tools and  
137 resources. This work shed new light on the origin and evolution of the wheat B genome, and will  
138 facilitate further studies of the complex polyploid genomes in wheat and other plants.

139

## 140 **Materials and Methods**

141

### 142 **Plant Materials**

143 Six “Chinese Spring” (CS) wheat B genome-*Ae. speltoides* disomic substitution lines [DS  
144 1S(1B), DS 2S(2B), DS 4S(4B), DS 5S(5B), DS 6S(6B), and DS 7S(7B)] (Friebe et al. 2011),  
145 one substitution line involving chromosome 3S and 3A [DS 3S(3A)], and the CS *ph1b* mutant  
146 were the initial genetic stocks used in this research. They were provided by the Wheat Genetics  
147 Resource Center at Kansas State University, USA. DS 3S(3A) was included in this study because  
148 DS 3S(3B) is not available (please see results in this study). In addition, six CS wheat B genome-  
149 *Thinopyrum elongatum* ( $2n=2x=14$ , genome EE) disomic substitution lines [DS 1E(1B), DS  
150 2E(2B), DS 3E(3B), DS 5E(5B), DS 6E(6B), and DS 7E(7B)] and one substitution line involving  
151 chromosome 4E and 4D [DS 4E(4D)] were used as controls to assess B-S genome homology in  
152 this study. DS 4E(4B) was not available. They were kindly supplied by J. Dvorak at UC Davis.  
153 Each of these disomic substitution lines has a pair of wheat chromosomes replaced by their  
154 homoeologous counterparts of *Ae. speltoides* or *Th. elongatum*. The common and durum wheat

155 (*T. turgidum* ssp. *durum*,  $2n=4x=28$ , genome AABB) accessions used in this study were selected  
156 from the worldwide diversity panel of the Triticeae Coordinated Agricultural Project (T-CAP).  
157 The other wheat species/accessions that contain the B genome were obtained from the U.S.  
158 National Plant Germplasm System. A total of 179 accessions under 13 wheat species (*Triticum*  
159 L.) were chosen based on their geographic origin and distribution, representing a diverse  
160 worldwide collection of the tetraploid and hexaploid wheat species (File S1). A subset of  
161 representative wheat species/accessions ( $n=88$ ) were selected for single nucleotide  
162 polymorphism (SNP) genotyping from the 179 accessions (File S2).

163

### 164 **Construction of the special genotypes for meiotic pairing analysis**

165 The CS-*Ae. speltoides* and CS-*Th. elongatum* disomic substitution lines were crossed and  
166 backcrossed with the CS *ph1b* mutant to construct the special genotypes monosomic for the  
167 individual B/A-S or B/D-E homoeologous pairs in the presence and absence of *Ph1*, respectively  
168 (Fig. S1). The chromosome-specific DNA markers (File S3) were employed to assist selection of  
169 the double monosomics for each of the homoeologous pairs. The selected individuals were  
170 verified for the monosomic condition by genomic *in situ* hybridization (GISH). The *Ph1*-specific  
171 DNA markers (Roberts *et al.*, 1999) were used to select the double monosomics with *Ph1* as well  
172 as those without *Ph1* (i.e. homozygous for *ph1b* deletion mutant) (Fig. S1).

173

174 Anthers with meiocytes [pollen mother cells (PMCs)] at metaphase I (MI) were collected for  
175 meiotic pairing analysis from the heterozygotes with and without *Ph1* following the procedure of  
176 Cai and Jones (1997). A total of over 100 meiocytes at MI from 1-6 plants were observed and  
177 analyzed for each of the special genotypes. GISH was used to differentially paint chromosomes  
178 of *Ae. speltoides*, *Th. elongatum*, and wheat for meiotic pairing analysis.

179

### 180 **DNA Marker Analysis**

181 DNA samples were prepared as described by Niu *et al.* (2011). Chromosome-specific DNA  
182 markers, including SSRs (simple sequence repeats) and STSs (sequence-tagged sites), were  
183 developed and used for the identification of individual B-, S-, and E-genome chromosomes as  
184 described by Chen *et al.* (2007). Two STS markers (*PSR128* and *PSR574*) that tag the *Ph1* allele  
185 were used to identify individuals homozygous for the *ph1b* deletion mutant (Roberts *et al.*,

186 1999). The wheat 90K iSelect SNP arrays were used to perform SNP genotyping assay for CS  
187 wheat, the disomic substitution lines, and the 88 representative wheat species/accessions (45  
188 hexaploids and 43 tetraploids) (File S2) using the Illumina iScan instrument. SNP allele  
189 clustering and genotype calling were conducted using the GenomeStudio v2011.1 software  
190 (Illumina, Inc.) (Wang et al. 2014). The polymorphisms for each of the homoeologous pairs at  
191 the SNP loci were calculated as the percentages of the polymorphic loci out of the total loci  
192 genotyped. The graphical view of the genotypes for the 88 wheat species/accessions at the 68  
193 SNP loci within the distal end of 1BL/1SL was constructed using the Flapjack software (Milne et  
194 al. 2010). Genetic diversity was calculated based on the SNP genotyping data of the 88  
195 representative wheat species/accessions (Nei 1973) and plotted against the SNP consensus  
196 linkage map of wheat chromosome 1B (Wang et al., 2014). The SNP genotype-based cluster  
197 dendrogram was developed using R package “ape” (<https://cran.r-project.org/>).

198

#### 199 **Fluorescent *in situ* hybridization (FISH)**

200 Fluorescent genomic *in situ* hybridization (FGISH) was performed to differentiate wheat B-  
201 genome and S/E-genome chromatin from each other as described by Cai et al. (1998). Total  
202 genomic DNAs of *Ae. speltoides* and *Th. elongatum* were labeled with biotin-16-dUTP by nick  
203 translation as probe DNA for detecting *Ae. speltoides* and *Th. elongatum* chromatin, respectively.  
204 Total genomic DNA of CS wheat was used as blocking DNA. *Ae. speltoides/Th. elongatum*  
205 chromatin was painted with fluorescein isothiocyanate-conjugated avidin (FITC-avidin) as  
206 yellow-green and wheat chromatin was counter-stained with propidium iodide (PI) as red.  
207 Multicolor FISH was conducted following the procedure of Liu et al. (2006). The clone *pTa71*, a  
208 wheat 9 kb rDNA repeating unit that contains the 18S, 5.8S, and 26S rRNA genes and intergenic  
209 spacer (Gerlach and Bedbrook, 1979), was supplied by Peng Zhang at The University of Sydney,  
210 Australia. It was labeled with dig-11-dUTP and detected by anti-dig-rhodamine as red. This  
211 rDNA probe was used to tag the nucleolar organizer region on wheat chromosomes 1B and 6B.  
212 Total genomic DNA of *Ae. speltoides* was labeled with biotin-16-dUTP and detected by FITC-  
213 avidin as yellow-green. This genomic probe was used to identify *Ae. speltoides* chromatin in the  
214 wheat genome. Wheat chromatin was counter-stained with 4',6-diamidino-2-phenylindole  
215 (DAPI) as blue. The fluorescence microscopy system BX51 (Olympus, Japan) was used to  
216 visualize GISH/FISH-painted chromosomes.

217

## 218 **DNA Sequence Analysis**

219 The DNA sequences of wheat chromosome 1B was extracted from the IWGSC RefSeq v1.0  
220 (<https://wheat-urgi.versailles.inra.fr/Seq-Repository/Assemblies>). The contextual sequences of  
221 the SNP loci at the distal ends of both CS wheat 1BL and *Ae. speltoides* 1SL were aligned to the  
222 DNA sequences of chromosome 1B using the Splign software (Kapustin et al. 2008). The  
223 physical order of the SNP loci was determined based on the DNA sequence alignment.

224

## 225 **Results**

226

### 227 **Homology analysis of the individual B/A-S homoeologous chromosome pairs**

228 Meiotic pairing has been considered direct cytological evidence for genome homology. It can,  
229 however, be influenced by the genetic factors in addition to homology, such as *Ph1* gene in  
230 wheat and *Ph1* suppressors in *Ae. speltoides*. To take account of the non-homology factors in the  
231 B-S genome homology analysis, we investigated meiotic pairing of individual B-S  
232 homoeologous pairs under the same genetic background of CS wheat in the presence and  
233 absence of *Ph1*. The CS wheat B genome-*Ae. speltoides* S genome disomic substitution lines  
234 dissect the S genome of *Ae. speltoides* into individual chromosomes in the CS wheat  
235 background. They were used to construct double monosomics for the individual B- and S-  
236 genome chromosomes. Meanwhile, the *ph1b* deletion mutant of *Ph1* was introduced into the  
237 double monosomics with assistance of the *Ph1*-specific DNA markers. Thus, we were able to  
238 investigate meiotic pairing of individual B-S homoeologous chromosome pairs in the presence as  
239 well as absence of *Ph1*. In addition, we investigated meiotic pairing of the individual B-E  
240 homoeologous chromosome pairs as controls for B-S genome homology analysis.

241

242 Chinese Spring wheat chromosome 1B was found to pair with *Ae. speltoides* chromosome 1S in  
243 67 of the 134 PMCs analyzed (50.00%), while other B/A-S homoeologous pairs had a relatively  
244 low meiotic pairing frequency ranging from 0.00 to 8.63% in the presence of *Ph1* (Fig. 1). In  
245 addition, we noticed that 1B-1S meiotic pairing predominantly involved the long arms of  
246 chromosome 1B (1BL) and 1S (1SL). Surprisingly, wheat 1BL was found to contain a small *Ae.*  
247 *speltoides* S genome-derived chromosomal segment at its distal end, where meiotic pairing



248 initiated (Fig. 2a). Also, the same *Ae. speltooides*-derived segment was observed on the unpaired  
249 1BL (univalent) (Fig. 2b). The *Ph1* suppressor genes mapped to *Ae. speltooides* chromosomes 3S,  
250 5S, and 7S (Dvorak et al. 2006). We found that meiotic pairing involving chromosome 5S was  
251 noticeably higher than that involving 2S, 3S, 4S, 6S, and 7S in the presence of *Ph1* (Fig. 1).  
252 Thus, there might be a *Ph1* suppressor on this particular *Ae. speltooides* chromosome 5S, but not  
253 on chromosomes 3S and 7S involved in this study. In the absence of *Ph1* (i.e. *ph1bph1b*),  
254 chromosomes 1B and 1S paired at a frequency of 60%, which was higher than the 1B-1S pairing  
255 frequency (50%) in the presence of *Ph1*. Meiotic pairing of other homoeologous pairs (2B-2S,  
256 3A-3S, 4B-4S, 5B-5S, 6B-6S, and 7B-7S) was dramatically enhanced by *ph1b* mutant (Fig. 1).  
257 5B<sup>*ph1b*</sup>-5S also exhibited a high pairing frequency (42.16%), suggesting absence of *Ph1* on *Ae.*  
258 *speltooides* chromosome 5S (Griffiths et al. 2006).

259  
260 Meiotic pairing was not observed between CS wheat chromosome 1B and *Th. elongatum*  
261 chromosome 1E in the 105 PMCs analyzed under the presence of *Ph1*. The other B/D-E  
262 homoeologous chromosome pairs also showed a low meiotic pairing frequency when *Ph1* was  
263 present (Fig. 1). Meiotic pairing of all B/D-E homoeologous chromosome pairs was enhanced by  
264 the *ph1b* mutant, but not as extensively as that with the B/A-S homoeologous chromosome pairs  
265 except 4D-4E and 5B-5E. Apparently, CS wheat chromosome 5B<sup>*ph1b*</sup> had a high meiotic pairing  
266 affinity with *Ae. speltooides* chromosome 5S as well as *Th. elongatum* chromosome 5E (Fig. 1).

267

### 268 **GISH/FISH analysis of wheat B-genome chromosomes**

269 Meiotic pairing analysis demonstrated a notable homology between CS wheat chromosome 1B  
270 and *Ae. speltooides* chromosome 1S (Fig. 1). Apparently, the *Ae. speltooides*-derived chromosomal  
271 segment at the distal end of 1BL contributed to the high 1B-1S pairing. To confirm the *Ae.*  
272 *speltooides* segment on 1BL and determine whether any additional *Ae. speltooides* segments are  
273 present on the CS B-genome chromosomes, we performed multicolor FISH/GISH to the mitotic  
274 chromosomes of CS wheat. The CS wheat chromosomes 1B and 6B were tagged by FISH using  
275 the rDNA probe *pTa71*; and *Ae. speltooides* chromatin was simultaneously painted by *Ae.*  
276 *speltooides* genomic DNA-probed GISH. An *Ae. speltooides* chromosomal segment was clearly  
277 detected at the distal end of CS 1BL, but not in other regions of chromosome 1B and other B-  
278 genome chromosomes (Fig. 2c). To further verify the origin of the distal segment on 1BL, we

279 performed *Th. elongatum* genomic DNA-probed GISH to all three chromosome sets of the CS  
280 wheat genome. No *Th. elongatum*-derived GISH signals were observed on any of the CS wheat  
281 chromosomes, including 1BL (Fig. 3A). Thus, the distal segment on CS chromosomal arm 1BL  
282 is *Ae. speltooides* S genome-specific, not a common chromosomal region shared by CS wheat and  
283 its relatives. It was derived from the S genome of *Ae. speltooides*.

284

285 We surveyed the B genome of 179 representative accessions under 13 wheat species (*Triticum*  
286 L.) for the presence of *Ae. speltooides* chromatin by GISH. They were collected from the different  
287 geographic regions around the world and represented a diverse collection of the hexaploid and  
288 tetraploid wheat species/accessions that contain the B genome. All of these wheat  
289 species/accessions were found to contain an *Ae. speltooides* chromosomal segment at the distal  
290 end of 1BL as what we observed on 1BL of CS wheat, but not in the other regions of  
291 chromosome 1B and other B-genome chromosomes (Table 1; Fig. 2c). Therefore, the *Ae.*  
292 *speltooides*-derived chromosomal segment is universally present at the distal end of 1BL in both  
293 tetraploid and hexaploid wheat. It has been part of chromosome 1B probably since the  
294 incorporation of the B genome into tetraploid and hexaploid wheat.

295

### 296 **Comparative analysis of the individual B-S homoeologous pairs**

297 Both CS wheat and CS-*Ae. speltooides* disomic substitution lines were genotyped using wheat  
298 90K iSelect SNP arrays. The SNP genotyping results indicated that the substitution line  
299 originally designated DS 3S(3B) (Friebe et al. 2011) should be DS 3S(3A), which was further  
300 confirmed by SSR markers and chromosome C-banding. Thus, DS 3S(3A), instead of DS  
301 3S(3B), was included in the SNP assay in addition to the substitution lines involving other six B-  
302 genome chromosomes (1B, 2B, 4B, 5B, 6B, and 7B).

303

304 High-throughput genotyping of CS wheat and the CS B genome-*Ae. speltooides* disomic  
305 substitution lines at 17,379 SNP loci identified a total of 6,722 SNPs polymorphic in the seven  
306 B/A-S homoeologous pairs. The homoeologous pair 2B-2S showed the lowest polymorphism  
307 (33.34%) and 7B-7S the highest (43.37%) at the SNP loci surveyed. The polymorphisms of other  
308 five B/A-S homoeologous pairs ranged from 33.89% (3A-3S) to 41.86% (4B-4S) (Fig. 4).  
309 Plotting of the SNP polymorphisms between CS wheat chromosome 1B and *Ae. speltooides*

310 chromosome 1S against the SNP consensus linkage map of chromosome 1B (Wang et al. 2014)  
311 identified a genomic region that shared the same alleles at 65 of the 68 SNP loci within the distal  
312 ends of CS wheat 1BL and *Ae. speltoides* 1SL (Fig. 3C). Such a monomorphic linkage block was  
313 not detected in other chromosomal regions of the 1B-1S homoeologous pair and on other B/A-S  
314 homoeologous pairs (Fig. S2).

315

### 316 **Genetic and physical characterization of the 1BL distal end**

317 The chromosomal regions at the distal ends of CS wheat 1BL and *Ae. speltoides* 1SL were found  
318 to be highly monomorphic at the 68 SNP loci (65 monomorphic/68 SNPs). The three  
319 polymorphic SNP loci within the region on 1BL and 1SL were positioned toward the proximal  
320 end of the region on the consensus linkage map (Wang et al. 2014). The entire region defined by  
321 the 68 SNPs spans a genetic distance of 12.7 cM (Fig. 3B and File S4). The contextual sequences  
322 of these 68 SNPs were aligned to the distal region of 1BL according to the IWGSC RefSeq v1.0  
323 (<https://wheat-urgi.versailles.inra.fr/Seq-Repository/Assemblies>). Two of the three SNP loci  
324 polymorphic between 1BL and 1SL, *Tdurum\_contig41999\_2908* and *Ex\_c1058\_1537*, were  
325 physically assigned to the proximal end of the region. The other polymorphic SNP within the  
326 region, *RFL\_Contig785\_1156*, was distal to the first two polymorphic SNPs. One monomorphic  
327 SNP (*RFL\_Contig785\_1700*) was physically positioned within the interval between  
328 *Tdurum\_contig41999\_2908* and *RFL\_Contig785\_1156* according to the sequence alignment  
329 (Fig. 3B and File S4).

330

331 The genomic region that spans the 65 SNP loci monomorphic between CS 1BL and *Ae.*  
332 *speltoides* 1SL and one polymorphic SNP (*RFL\_Contig785\_1156*) was estimated to be 9.61 Mb  
333 in length according to the DNA sequence assemblies of 1BL ([https://wheat-](https://wheat-urgi.versailles.inra.fr/Seq-Repository/Assemblies)  
334 [urgi.versailles.inra.fr/Seq-Repository/Assemblies](https://wheat-urgi.versailles.inra.fr/Seq-Repository/Assemblies)). The two polymorphic SNP loci  
335 (*Tdurum\_contig41999\_2908* and *Ex\_c1058\_1537*) at the proximal end of that region were not  
336 included in the estimate (Fig. 3D). In addition, we identified an extended terminal segment of  
337 0.85 Mb distal to the 68 SNP-defined region on 1BL according to the DNA sequence alignment.  
338 As a result, the total physical length of the SNP-defined and extended distal genomic region on  
339 1BL was estimated to be 10.46 Mb (Fig. 3D). The actual physical size of this distal segment on  
340 1BL might be greater than this estimate (10.46 Mb) because the current DNA sequence

341 assemblies (<https://wheat-urgi.versailles.inra.fr/Seq-Repository/Assemblies>) we used in this  
342 study cover 689.9 Mb out of the total length 849 Mb of chromosome 1B (Šafář et al. 2010).

343  
344 Four hexaploid wheat accessions (Cltr8347, PI429624, PI481728, and CI13113), similar to CS  
345 wheat, were found to be highly monomorphic with CS DS1S(1B) at the 68 SNP loci within the  
346 distal regions of 1BL and 1SL (Fig. S3). They were clustered together with CS wheat and CS  
347 DS1S(1B) in the dendrogram (Fig. 5). Cltr8347, PI429624, and PI481728 are the landraces from  
348 China, Nepal, and Bhutan, respectively. Both CS and Cltr8347 are the landraces collected  
349 probably in southwest China (P.D. Chen, personal communication), which is geographically  
350 close to the Himalayan region where Nepal and Bhutan are located. CI13113 is a winter wheat  
351 germplasm line with CS involved in the pedigree (<http://www.arsgrin.gov/npgs/>). Thus, these  
352 five hexaploid wheat accessions seem to share a similar origin of this particular *Ae. speltoides*-  
353 derived genomic region on 1BL. In addition, we found that 11 tetraploid wheat accessions share  
354 the same genotypes at the 68 SNP loci on 1BL (Fig. S3), making them clustered together in the  
355 dendrogram (Fig. 5). These tetraploid wheat accessions originated from two primary  
356 geographical regions, the Mediterranean Basin and South America (File S2). Overall, the  
357 tetraploid wheat accessions showed higher genetic variability than hexaploids in the 68 SNP-  
358 defined genomic region on 1BL according to the cluster dendrogram and genetic diversity  
359 analysis (Figs. 5 and 6).

360  
361 Four of the 68 SNP loci (46805, 31066, 50867, and 76928) showed no allelic variation at all in  
362 the 88 wheat accessions. The other four SNPs (71971, 65270, 71898, and 78965) had very  
363 minimal variation in the wheat accessions (Fig. S3; File S4). Apparently, these SNP loci have  
364 been very conservative over the evolutionary process of this chromosomal region.

365

## 366 **Discussion**

367

368 *Ae. speltoides* has been considered the diploid species with a genome most closely related to the  
369 wheat B genome according to the previous studies (Jenkins 1929; Pathak 1940; Sarkar and  
370 Stebbins 1956; Riley et al. 1958; Dvorak and Zhang 1990; Sasanuma et al. 1996; Wang et al.  
371 1997; Kilian et al. 2007). However, the relationship of the *Ae. speltoides* S genome with the

372 wheat B genome remains largely obscure. Previous meiotic pairing-based homology analyses  
373 had led to inconsistent conclusions about the evolutionary relationship of the B and S genomes  
374 due primarily to the influence of the *Ae. speltooides*-derived *Ph1* suppressors on meiotic pairing  
375 (Jenkins 1929; Riley et al. 1958; Kimber and Athwal 1972). In the present study, we partitioned  
376 the B and S genomes and investigated meiotic pairing of the individual B/A-S homoeologous  
377 pairs in the presence as well as absence of *Ph1*. This allowed us to monitor the effect of *Ph1* and  
378 *Ph1* suppressors in meiotic homoeologous pairing and to precisely assess homology for the  
379 individual B/A-S homoeologous pairs.

380

381 Substantial meiotic pairing was observed between CS wheat chromosome 1B and *Ae. speltooides*  
382 chromosome 1S in the presence of *Ph1* and absence of other S-genome chromosomes. The 1B-  
383 1S pairing frequency (50.00%) was significantly higher than any other B/A-S homoeologous  
384 pairs (0.00-8.63%). Chromosome 1S does not contain a *Ph1* suppressor gene (Dvorak et al.  
385 2006). Therefore, no *Ph1* suppressor was involved in the 1B-1S meiotic pairing analysis. It was  
386 homology that made CS wheat chromosome 1B pair with *Ae. speltooides* chromosome 1S in a  
387 relatively high frequency. A small *Ae. speltooides*-derived chromosomal segment was detected at  
388 the distal end of CS wheat 1BL by GISH. Also, we found that 1B-1S meiotic pairing occurred  
389 mostly on the long arms (i.e. 1BL-1SL) that share the *Ae. speltooides* segment at the distal ends.  
390 Therefore, this *Ae. speltooides*-derived segment was the homologous counterpart on chromosomes  
391 1B and 1S that initiated high meiotic pairing between them. Extremely low meiotic pairing (0 out  
392 of 105 PMCs) was observed between CS wheat chromosome 1B and *Th. elongatum* chromosome  
393 1E in the presence of *Ph1*. Also, a *Th. elongatum*-specific segment was not detected on 1B and  
394 other B-genome chromosomes of CS wheat by GISH. As a control, these findings further  
395 confirmed the *Ae. speltooides* origin of the distal 1BL region in CS wheat.

396

397 We detected the *Ae. speltooides*-originated chromosomal segment at the distal end of 1BL in a  
398 representative worldwide collection of tetraploid (including wild and cultivated emmer wheat)  
399 and hexaploid wheat (n=179) in addition to CS wheat. Apparently, this *Ae. speltooides*-originated  
400 segment on 1BL has been part of the B genome in both tetraploid and hexaploid wheat species  
401 probably since the initial incorporation of the B genome into tetraploid wheat. Also, we found  
402 that tetraploid wheat had higher genetic diversity than hexaploid wheat within the *Ae. speltooides*-

403 originated genomic region on 1BL, suggesting an evolutionary pattern similar to other genomic  
404 regions of polyploid wheat (Doebley et al. 2006). All these new findings consistently support the  
405 conclusion that *Ae. speltoides* had been involved in the origin of the wheat B genome. The *Ae.*  
406 *speltoides*-originated chromosomal segment on wheat chromosome 1BL has been retained in the  
407 B genome probably throughout the entire evolutionary and domestication process of polyploid  
408 wheat.

409

410 High-throughput SNP genotyping of individual B/A-S homoeologous pairs and the 88  
411 representative wheat species/accessions identified a sizable highly monomorphic linkage block  
412 (12.7 cM) at the distal ends of wheat 1BL and *Ae. speltoides* 1SL. This was surprisingly  
413 consistent with the meiotic pairing and GISH results, supporting the *Ae. speltoides* origin of the  
414 distal segment on 1BL. The SNP-defined monomorphic genomic region and extended distal end  
415 on 1BL was estimated to be 10.46 Mb in physical size based on the genomic DNA sequence  
416 assemblies of chromosome 1B currently available from IWGSC RefSeq v1.0 ([https://wheat-](https://wheat-urgi.versailles.inra.fr/Seq-Repository/Assemblies)  
417 [urgi.versailles.inra.fr/Seq-Repository/Assemblies](https://wheat-urgi.versailles.inra.fr/Seq-Repository/Assemblies)). This estimate is about 1.2% of the total length  
418 of chromosome 1B (849 Mb) (Šafář et al. 2010). The GISH-detected *Ae. speltoides* segment on  
419 1BL spans approximately 2.0% of the cytogenetic length of chromosome 1B. In addition, the  
420 DNA sequence assemblies of the IWGSC RefSeq v1.0 cover approximately 81.3% of the entire  
421 chromosome 1B (689.9 Mb out of 849 Mb) (Šafář et al. 2010). Thus, the monomorphic linkage  
422 block is probably a major portion of the *Ae. speltoides*-originated chromosomal segment on 1BL.  
423 The actual physical size of the *Ae. speltoides*-originated distal segment on 1BL might be greater  
424 than the estimate of 10.46 Mb.

425

426 Relatively low meiotic pairing was observed with each of other B/A-S homoeologous pairs in the  
427 presence of *Ph1*. In addition, we did not detect any *Ae. speltoides*-originated chromosomal  
428 segments in the other regions of chromosome 1B and on other B-genome chromosomes by  
429 GISH. Are there additional *Ae. speltoides*-originated chromosomal segments that are too small to  
430 leverage meiotic pairing and undetectable by GISH in the wheat B genome? We observed small  
431 monomorphic linkage blocks at multiple locations in other regions of chromosome 1B and on  
432 other B-genome chromosomes, but none was comparable in size to the one at the distal end of  
433 1BL. Also, a clear association of those monomorphic linkage blocks with meiotic pairing could

434 not be established in this study. Thus, we were unable to determine whether those B-genome  
435 chromosomal regions originated from *Ae. speltoides*. Further studies, such as genome-wide  
436 sequence comparative analysis, are needed to uncover the evolutionary relationship of those  
437 genomic regions with *Ae. speltoides*.

438

439 In summary, we conclude that *Ae. speltoides* had been involved in the origin and evolution of the  
440 wheat B genome. The current form of *Ae. speltoides* should not be considered an exclusive donor  
441 of the B genome. *Ae. speltoides* is probably one of the diploid ancestors involved in the  
442 evolutionary lineage of the B genome as stated in the theory of polyphyletic origin (Zohary and  
443 Feldman 1962). The wheat B genome might be a genome reconstructed from the homoeologous  
444 meiotic recombination between multiple ancestral genomes of *Aegilops* species, including *Ae.*  
445 *speltoides*. Further studies of *Aegilops* species, especially those in the Sitopsis section, may  
446 reveal additional insights into the origin and evolution of the wheat B genome.

447

448

449

450

451

452

453

454

455

456

457

458

459

460

461

462

463

464

465 **Author contributions**

466

467 W.Z. and M.Z. equally contributed to this work on crossing, meiotic pairing analysis, SNP  
468 assays, GISH/FISH, comparative analysis of the homoeologous genomic regions, and manuscript  
469 preparation. X.Z. participated in crossing, chromosome-specific marker analysis, GISH, and  
470 manuscript preparation. Y.C. participated in GISH analysis. Q.S. performed computation in  
471 DNA sequence and comparative analysis. G.M. was involved in material maintenance and  
472 crossing. S.H. ran SNP assays and participated in manuscript preparation. C.Y. participated in  
473 DNA sequence and comparative analysis. S.S.X. was involved in data analysis and manuscript  
474 preparation. X.C. designed and coordinated this work, made crosses, analyzed and interpreted all  
475 experimental data, and prepared the manuscript.

476

477 **Acknowledgements**

478

479 We thank members of the labs involved for their help to this research and Drs. Lili Qi and  
480 Rebekah Oliver for their critical review of the manuscript. This project is supported by  
481 Agriculture and Food Research Initiative Competitive Grant no. 2013-67013-21121 from the  
482 USDA National Institute of Food and Agriculture.

483

484

485 **Conflict of interest statement**

486

487 The authors declare that they have no conflict of interest.



## References

- Blake NK, Leffler BR, Lavin M, Talbert LE (1999) Phylogenetic reconstruction based on low copy DNA sequence data in an allopolyploid: The B genome of wheat. *Genome* 42:351–360
- Cai X, Jones S (1997) Direct evidence for high level of autosyndetic pairing in hybrids of *Thinopyrum intermedium* and *Th. ponticum* with *Triticum aestivum*. *Theor Appl Genet* 95:568–572
- Cai X, Jones S, Murray T (1998) Molecular cytogenetic characterization of *Thinopyrum* and wheat-*Thinopyrum* translocated chromosomes in a wheat *Thinopyrum* amphiploid. *Chromosome Res* 6:183–189
- Chao S, Sharp PJ, Worland AJ, Koebner RMD, Gale MD (1989) RFLP-based genetic maps of homoeologous group 7 chromosomes. *Theor Appl Genet* 78:495–504
- Chen X, Faris JD, Hu J, Stack RW, Adhikari T, Elias EM, Kianian SF, Cai X (2007) Saturation and comparative mapping of a major Fusarium head blight resistance QTL in tetraploid wheat. *Mol Breed* 19:113–124
- Doebley JF, Gaut BS, Smith BD (2006) The molecular genetics of crop domestication. *Cell* 127:1309–1321
- Dvorak J (1972) Genetic variability in *Aegilops speltoides* affecting homoeologous pairing in wheat. *Can J Genet Cytol* 14:371–380
- Dvorak J, Zhang HB (1990) Variation in repeated nucleotide sequences sheds light on the phylogeny of the wheat B and G genomes. *Proc Natl Acad Sci USA* 87:9640–9644
- Dvorak J, Diterlizzi P, Zhang HB, Resta P (1993) The Evolution of polyploid wheats - identification of the A-genome donor species. *Genome* 36:21–31
- Dvorak J, Deal KR, Luo MC (2006) Discovery and mapping of wheat *Ph1* suppressors. *Genetics* 174:17–27
- Felsenburg T, Levy AA, Galili G, Feldman M (1991) Polymorphism of high molecular weight glutenins in wild tetraploid wheat: spatial and temporal variation in a native site. *Isr J Bot* 40:451–479
- Friebe B, Qi L, Liu C, Gill B (2011) Genetic compensation abilities of *Aegilops speltoides* chromosomes for homoeologous B-genome chromosomes of polyploid wheat in disomic S(B) chromosome substitution lines. *Cytogenet Genome Res* 134:144–150

- Gerlach WL, Bedbrook JR (1979) Cloning and characterization of ribosomal RNA genes from wheat and barley. *Nucleic Acids Res* 7:1869–1885
- Gill BS, Kimber G (1974) Giemsa C-banding and the evolution of wheat. *Proc Natl Acad Sci USA* 71:4086–4090
- Griffiths S, Sharp R, Foote TN, Bertin I, Wanous M, Reader S, Colas I, Moore G (2006) Molecular characterization of *Ph1* as a major chromosome pairing locus in polyploid wheat. *Nature* 439:749–752
- Huang S, Sirikhachornkit A, Su X, Faris J, Gill B, Haselkorn R, Gornicki P (2002) Genes encoding plastid acetyl-CoA carboxylase and 3-phosphoglycerate kinase of the *Triticum/Aegilops* complex and the evolutionary history of polyploid wheat. *Proc Natl Acad Sci USA* 99:8133–8138
- Jenkins JA (1929) Chromosome homologies in wheat and *Aegilops*. *Am J Bot* 16:238-245
- Johnson BL (1972) Protein electrophoretic profiles and the origin of the B genome of wheat. *Proc Natl Acad Sci USA* 69:1398–1402
- Kapustin Y, Souvorov A, Tatusova T, Lipman D (2008) Splign: algorithms for computing spliced alignments with identification of paralogs. *Biol Direct* 3:20
- Kihara H (1919) Ueber cytologische Studien bei einigen Getreidearten. Spezies-Bastarde des Weizen und Weizenroggen-Bastard. *Bot Mag* 33:17–38
- Kihara H (1944) Discovery of the DD-analyser, one of the ancestors of vulgare wheat. *Agric Hortic* 19:889–890
- Kihara H (1954) Considerations on the evolution and distribution of *Aegilops* species based on the analyzer-method. *Cytologia* 19:336–357
- Kihara H, Yamashita K, Tanaka M (1959) Genomes of 6x species of *Aegilops*. *Wheat Inf Serv* 8:3–5
- Kilian B, Özkan H, Deusch O, Effgen S, Brandolini A, Kohl J, Martin W, Salamini F (2007) Independent wheat B and G genome origins in outcrossing *Aegilops* progenitor haplotypes. *Mol Biol Evol* 24: 217–227.
- Kimber G, Athwal RS (1972) A reassessment of the course of evolution in wheat. *Proc Natl Acad Sci USA* 69:912–915.

- Liu Z, Yue W, Dong YS, Zhang XY (2006) Identification and preliminary analysis of several centromere-associated bacterial artificial chromosome clones from a diploid wheat (*Triticum boeoticum* Boiss.) library. *J Integr Plant Biol* 48:348–358.
- McFadden ES, Sears ER (1946) The origin of *Triticum speltoides* and its free-threshing hexaploid relatives. *J Hered* 37:107–116.
- Milne I, Shaw P, Stephen G, Bayer M, Cardle L, Thomas WTB, Flavell AJ, Marshall D (2010) Flapjack - graphical genotype visualization. *Bioinformatics* 26:3133–3134.
- Nei M (1973) Analysis of gene diversity in subdivided populations. *Proc Natl Acad Sci USA* 70, 3321–3323.
- Niu Z, Klindworth DL, Friesen TL, Chao S, Jin Y, Cai X, Xu SS (2011) Targeted introgression of a wheat stem rust resistance gene by DNA marker-assisted chromosome engineering. *Genetics* 187:1011–1021
- Ogihara T, Tsunewaki K (1988) Diversity and evolution of chloroplast DNA in *Triticum* and *Aegilops* as revealed by restriction fragment analysis. *Theor Appl Genet* 76, 321–332.
- Pathak GN (1940) Studies in the cytology of cereals. *J Genet* 39:437–467
- Petersen G, Seberg O, Yde M, Berthelsen K (2006) Phylogenetic relationships of *Triticum* and *Aegilops* and evidence for the origin of the A, B, and D genomes of common wheat (*Triticum aestivum*). *Mol Phylogenet Evol* 39:70–82
- Riley R, Unrau J, Chapman V (1958) Evidence on the origin of the B genome of wheat. *J Hered* 49:90–98
- Riley R, Kimber G, Chapman V (1961) Origin of genetic control of diploid-like behavior of polyploid wheat. *J Hered* 52:22–25
- Roberts MA, Reader SM, Dalgliesh C, Miller TE, Foote TN, Fish LJ, Snape JW, Moore G (1999) Induction and characterization of *Phl* wheat mutants. *Genetics* 153:1909–1918
- Šafař J, Šimková H, Kubaláková M, Číhalíková J, Suchánková P, Bartoš J, Doležel J (2010) Development of chromosome-specific BAC resources for genomics of bread wheat. *Cytogenet Genome Res* 129:211–223
- Sakamura T (1918) Kurze Mitteilung über die Chromosomenzahlen und die Verwandtschaftsverhältnisse der *Triticum*-Arten. *Bot Mag* 32:150–153
- Salse J, Chague V, Bolot S, Magdelenat G, Huneau C, Pont C, Belcram H, Couloux A, Gardais S, Evrard A, Segurens B, Charles M, Ravel C, Samain S, Charmet G, Boudet N, Chalhoub B

- (2008) New insights into the origin of the B genome of hexaploid wheat: evolutionary relationships at the SPA genomic region with the S genome of the diploid relative *Aegilops speltoides*. *BMC Genomics* 9:555
- Sarkar P, Stebbins GL (1956) Morphological evidence concerning the origin of the B genome in wheat. *Am J Bot* 43:297–304
- Sasanuma T, Miyashita NT, Tsunewaki K (1996) Wheat phylogeny determined by RFLP analysis of nuclear DNA. 3. Intra- and interspecific variations of five *Aegilops* Sitopsis species. *Theor Appl Genet* 92:928–934
- Sax K (1922) Sterility in wheat hybrids. II. Chromosome behavior in partially sterile hybrids. *Genetics* 7:513–552
- Siedler H, Messmer MM, Schachermayr GM, Winzeler H, Winzeler M, Keller B (1994) Genetic diversity in European wheat and spelt breeding material based on RFLP data. *Theor Appl Genet* 88:994–1003
- Wang GZ, Miyashita NT, Tsunewaki K (1997) Plasmon analyses of *Triticum* (wheat) and *Aegilops*: PCR-single-strand conformational polymorphism (PCR-SSCP) analyses of organellar DNAs. *Proc Natl Acad Sci USA* 94:14570–14577
- Wang S, Wong D, Forrest K, Allen A, Huang BE, Maccaferri M, Salvi S, Milner SG, Cattivelli L, Mastrangelo AM, Whan A, Stephen S, Barker G, Wieseke R, Plieske J, International Wheat Genome Sequencing Consortium, Lillemo M, Mather D, Appels R, Dolferus R, Brown-Guedira G, Korol A, Akhunova AR, Feuillet C, Salse J, Morgante M, Pozniak C, Luo MC, Dvorak J, Morell M, Dubcovsky J, Ganal M, Tuberosa R, Lawley C, Mikoulitch I, Cavanagh C, Edwards KJ, Hayden M, Akhunov E (2014) Characterization of polyploid wheat genomic diversity using a high-density 90,000 single nucleotide polymorphism array. *Plant Biotechnol J* 12:787–796
- Zohary D, Feldman M (1962) Hybridization between amphidiploids and the evolution of polyploids in the wheat (*Aegilops-Triticum*) group. *Evolution* 16:44–61

**Table 1** Presence of the *Ae. speltooides*-originated segment on chromosome 1BL in the 179 accessions under 13 wheat species (*Triticum* L.)

| Species                 | Genome | No. accessions | <i>Ae. speltooides</i> segment on 1BL* | Origin                                                                                                                                                                                                                                                                                                                                                                                                            |
|-------------------------|--------|----------------|----------------------------------------|-------------------------------------------------------------------------------------------------------------------------------------------------------------------------------------------------------------------------------------------------------------------------------------------------------------------------------------------------------------------------------------------------------------------|
| <i>T. aestivum</i>      | AABBDD | 61             | +                                      | Afghanistan, Algeria, Armenia, Australia, Belgium, Bhutan, Bosnia, Canada, China, Croatia, Czech Republic, Denmark, Egypt, Finland, France, Georgia, Germany, Greece, Hungary, India, Iran, Iraq, Israel, Italy, Japan, Kazakhstan, Macedonia, Mexico, Montenegro, Nepal, Pakistan, Russia, Serbia, Spain, Sweden, Switzerland, Syria, Tajikistan, Tunisia, Turkey, Ukraine, USA                                  |
| <i>T. compactum</i>     | AABBDD | 5              | +                                      | Turkey, Syria, Egypt, USA                                                                                                                                                                                                                                                                                                                                                                                         |
| <i>T. macha</i>         | AABBDD | 3              | +                                      | Former Soviet Union, Iran, USA                                                                                                                                                                                                                                                                                                                                                                                    |
| <i>T. spelta</i>        | AABBDD | 10             | +                                      | USA, Ethiopia, Iran, Germany, Belgium, Afghanistan, Macedonia, Spain                                                                                                                                                                                                                                                                                                                                              |
| <i>T. sphaerococcum</i> | AABBDD | 5              | +                                      | Iraq, China, USA, Germany, Pakistan                                                                                                                                                                                                                                                                                                                                                                               |
| <i>T. vavilovii</i>     | AABBDD | 1              | +                                      | Sweden                                                                                                                                                                                                                                                                                                                                                                                                            |
| <i>T. dicoccoides</i>   | AABB   | 3              | +                                      | Israel, Hungary                                                                                                                                                                                                                                                                                                                                                                                                   |
| <i>T. polonicum</i>     | AABB   | 2              | +                                      | Hungary, Jordan                                                                                                                                                                                                                                                                                                                                                                                                   |
| <i>T. dicoccum</i>      | AABB   | 2              | +                                      | Russia, USA                                                                                                                                                                                                                                                                                                                                                                                                       |
| <i>T. carthlicum</i>    | AABB   | 2              | +                                      | Iran, Georgia                                                                                                                                                                                                                                                                                                                                                                                                     |
| <i>T. turgidum</i>      | AABB   | 2              | +                                      | Ethiopia, China                                                                                                                                                                                                                                                                                                                                                                                                   |
| <i>T. turanicum</i>     | AABB   | 2              | +                                      | Morocco                                                                                                                                                                                                                                                                                                                                                                                                           |
| <i>T. durum</i>         | AABB   | 81             | +                                      | Argentina, Bulgaria, Mexico, Israel, Italy, Canada, Peru, Uzbekistan, Russia, Algeria, Azerbaijan, South Africa, Chile, Ukraine, Ecuador, Lebanon, United Kingdom, Ethiopia, France, China, India, Jordan, Malta, Oman, Hungary, Portugal, Pakistan, Saudi Arabia, Serbia, Nigeria, Morocco, Tunisia, Yemen, Turkey, Afghanistan, Portugal, Cyprus, Egypt, Eritrea, Iran, Iraq, Macedonia, North Africa, Pakistan |

\* “+” indicates presence of the *Ae. speltooides* segment on wheat chromosome 1BL.

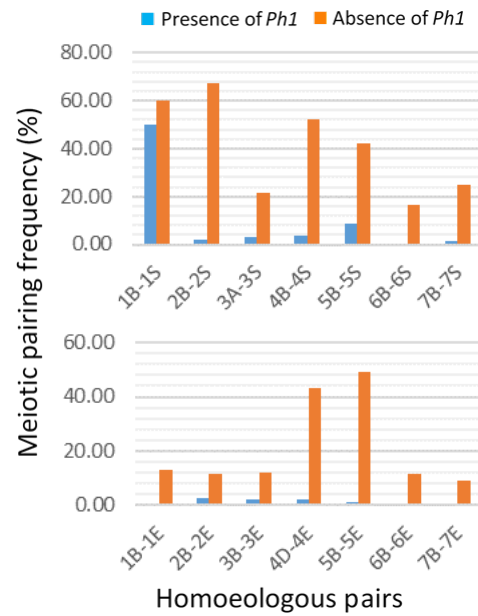

**Figure 1** Meiotic pairing frequency of B/A-S (*top*) and B/D-E (*bottom*) homoeologous pairs in the presence and absence of *Ph1*.

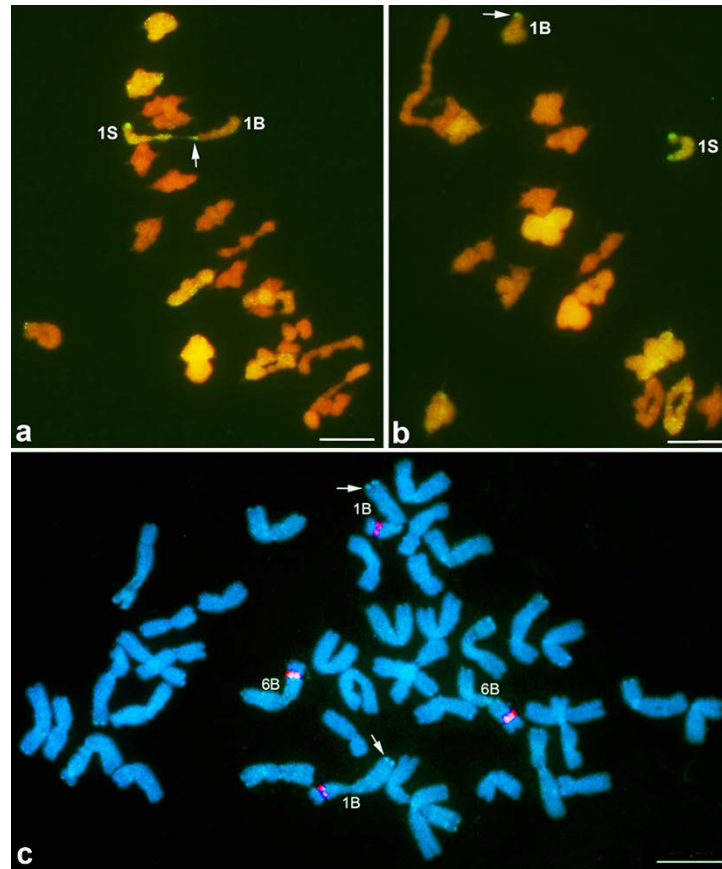

**Figure 2** GISH/FISH-painted wheat and *Ae. speltoides* chromosomes. **a)** Showing meiotic pairing of CS wheat chromosome 1B with *Ae. speltoides* chromosome 1S as a rod bivalent; **b)** showing unpaired 1B and 1S chromosomes (univalents); and **c)** showing mitotic chromosomes of CS wheat. Arrows point to the *Ae. speltoides*-originated chromosomal segment on 1BL. Wheat and *Ae. speltoides* chromatin was painted as red and yellow-green by GISH, respectively (**a** & **b**). The *Ae. speltoides*-originated chromosomal segment was painted as light blue-green by GISH and the nucleolar organizer regions on 1BS and 6BS were painted as red by FISH. Wheat chromatin was counter-stained as blue by DAPI (**c**). Scale bar = 10 μm.

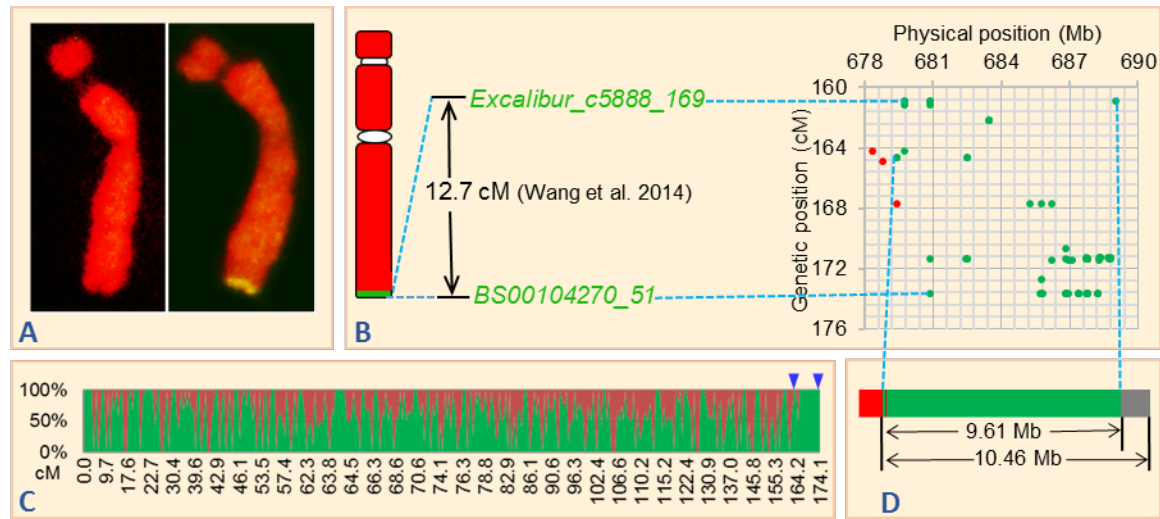

**Figure 3** Cytogenetic and molecular mapping of the *Ae. speltoides*-originated chromosomal segment on 1BL. **A)** GISH-painted CS wheat chromosome 1B using *Th. elongatum* genomic DNA as probe (*left*) and *Ae. speltoides* genomic DNA as probe (*right*); wheat chromatin was painted as red and *Ae. speltoides/Th. elongatum* chromatin as yellow-green. **B)** Graphical representation of GISH-painted wheat chromosome 1B using *Ae. speltoides* genomic DNA as probe (*left*); genetic size of the highly monomorphic linkage block harboring 68 SNP loci at the distal ends of 1BL and 1SL (*middle*); and genetic and physical locations of the 68 SNP loci within the region (*right*). Green dots refer to the SNP loci monomorphic between CS wheat 1BL and *Ae. speltoides* 1SL; red dots refer to the polymorphic SNP loci. **C)** SNP-based comparative graph showing the distribution of polymorphisms between CS wheat chromosome 1B and *Ae. speltoides* chromosome 1S. Red areas refer to polymorphisms and green areas to monomorphisms. Arrow heads demarcate the highly monomorphic linkage block. **D)** Estimated physical size of the highly monomorphic linkage block harboring the 66 SNP loci and the extended region at the distal end of 1BL. Red, green, and grey bars refer to the polymorphic, monomorphic, and extended genomic regions, respectively.



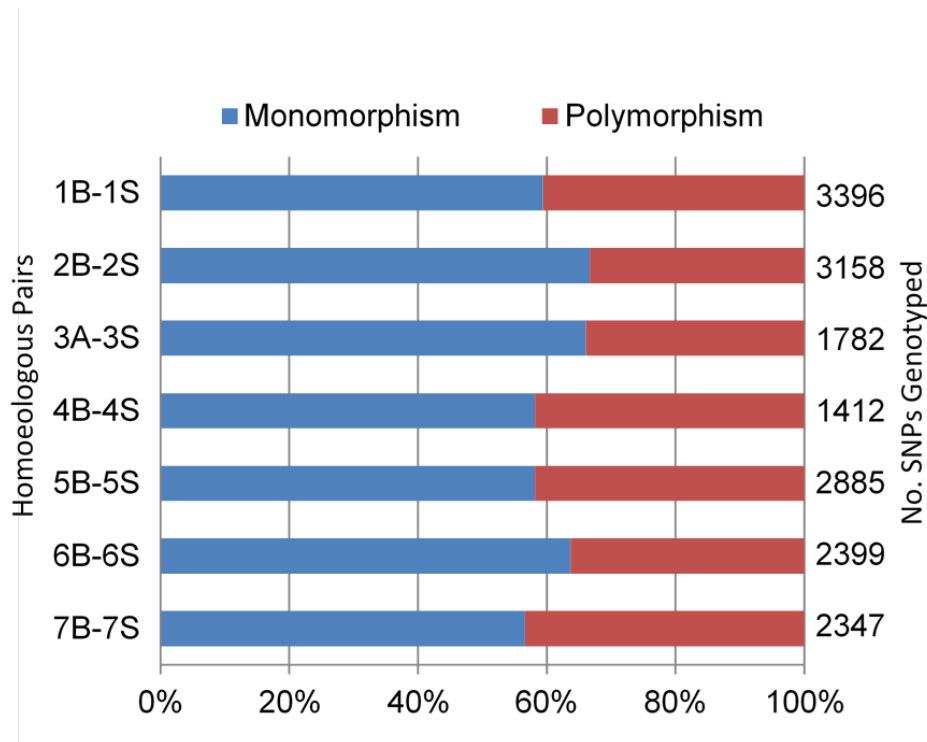

**Figure 4** Polymorphisms of individual B/A-S homoeologous pairs at the SNP loci mapped on wheat B/A-genome chromosomes.

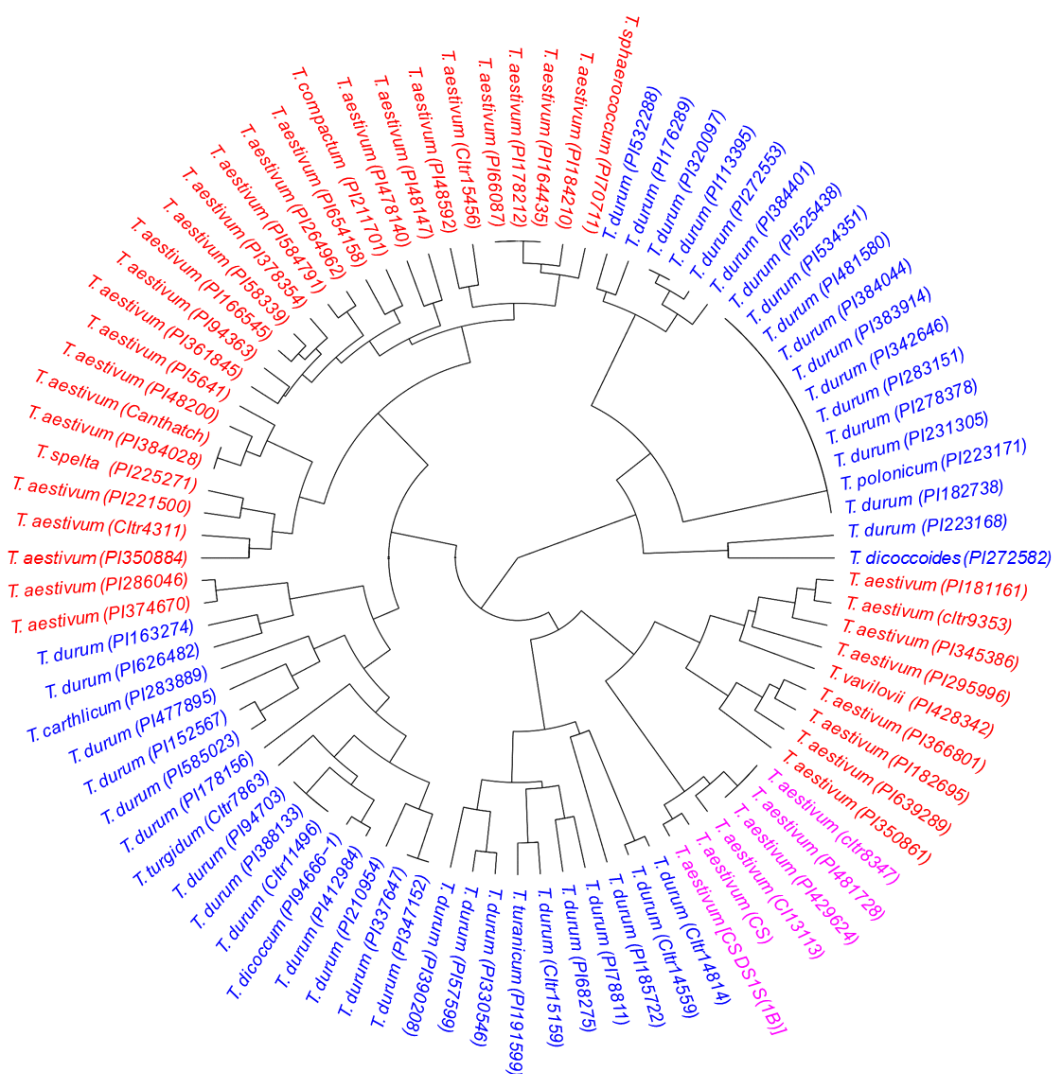

**Figure 5** Cluster dendrogram of the 88 representative wheat species/accessions constructed based on the genotypes at the 68 SNP loci within the distal end of 1BL.

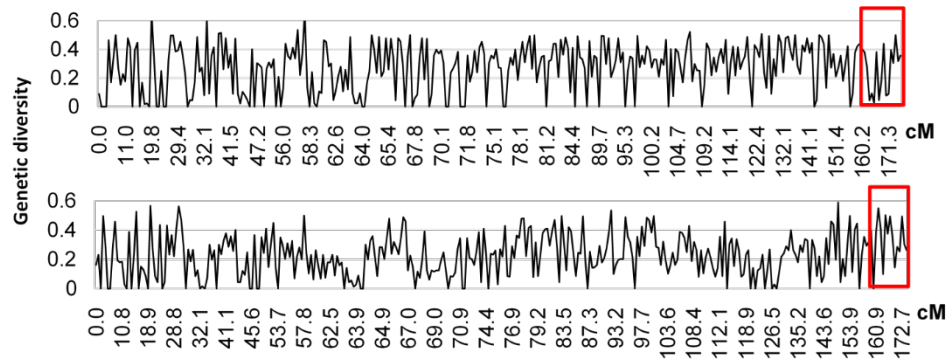

**Figure 6** Genetic diversity at the SNP loci on chromosome 1B in 45 hexaploid wheat accessions (*top*) and 43 tetraploid wheat accessions (*bottom*). Red rectangles mark the *Ae. speltoides*-originated chromosomal region spanning the 68 SNP loci at the distal end of 1BL. Y-axis indicates genetic diversity defined as the probability of two different alleles randomly selected from the population.
